# Supplementary material
Source: Springer Nature journal article supplement (https://www.springermedizin.de/resource/supplementary/12958_2009_630_MOESM2_ESM.pdf/9568558)

**A**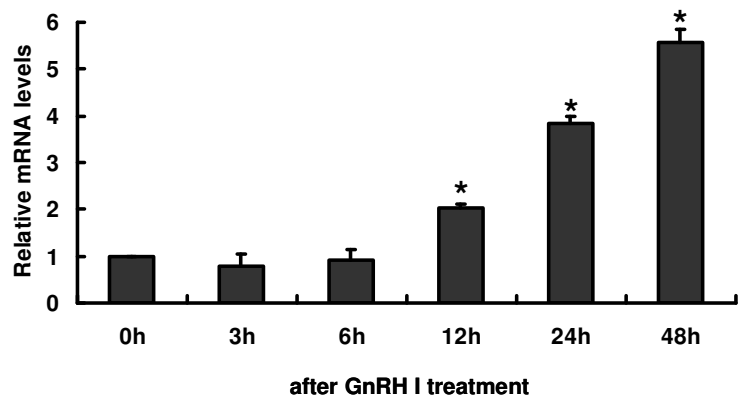**B**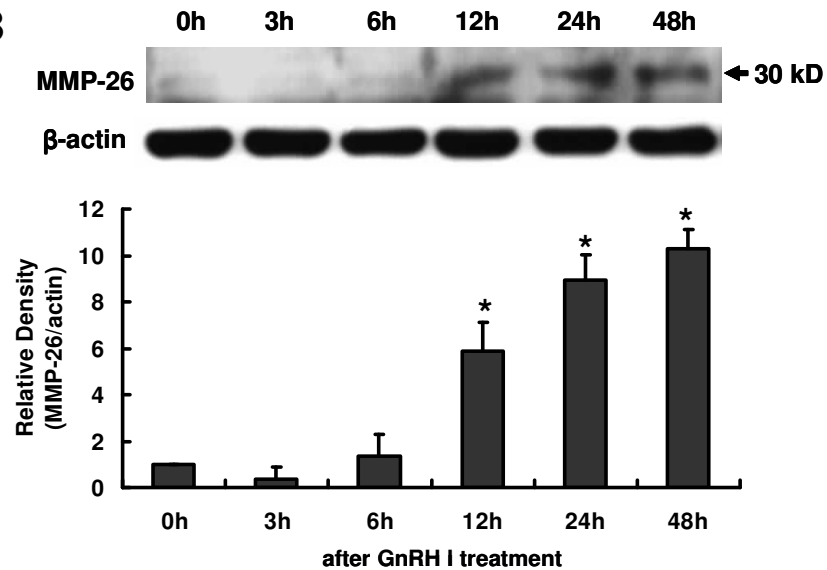**C**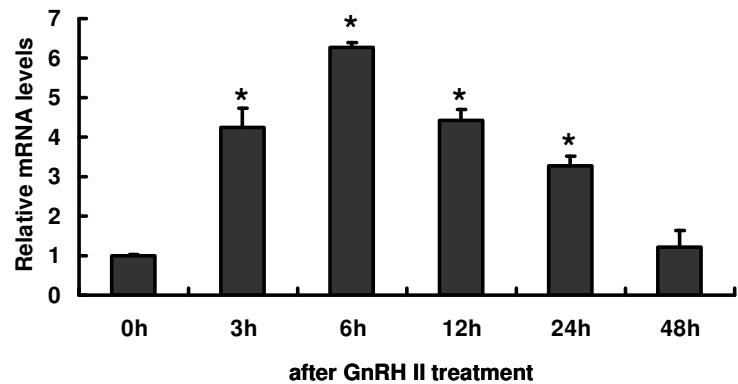**D**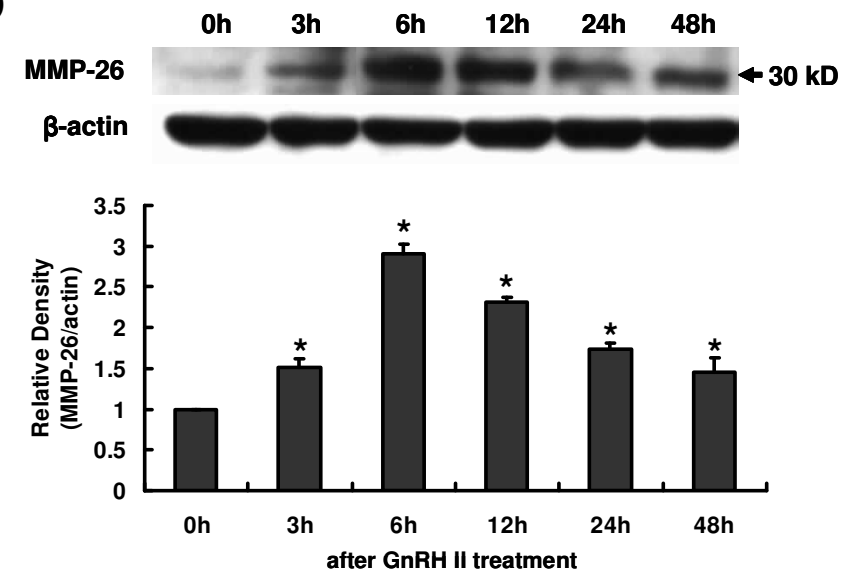

Supplement: MOESM2 [file 9568558]
